# Supplementary material for: Chain length dependence of the helix orientation in Langmuir–Blodgett monolayers of α-helical diblock copolypeptides
Source: Royal Society of Chemistry journal article supplement (doi:10.1039/c001163k), 2010-01-01
Supplement: c001163k.pdf [file c001163k.pdf]

# Chain length dependence of the helix orientation in Langmuir-Blodgett monolayers of $\alpha$ -helical diblock copolypeptides

*Le-Thu T. Nguyen, Aditya Ardana, Eltjo J. Vorenkamp, Gerrit ten Brinke, and Arend J. Schouten\**

Department of Polymer Chemistry, Zernike Institute for Advanced Materials, University of Groningen,  
Nijenborgh 4, 9747 AG Groningen, The Netherlands

\* Corresponding author. E-mail address: A.J.Schouten@rug.nl

## SUPPLEMENTARY INFORMATION

### Transmission FT-IR spectra

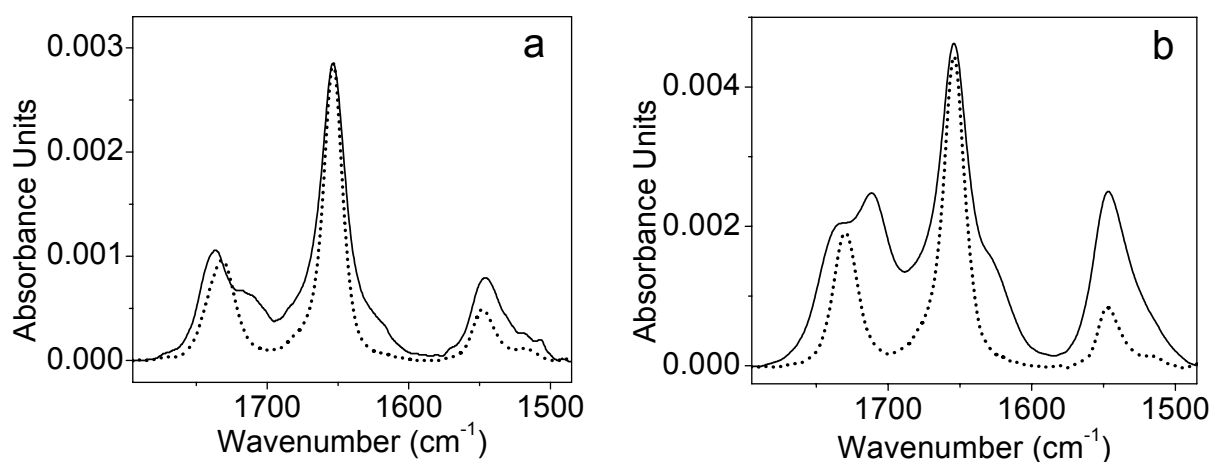

**Figure 1.** (a) Transmission FT-IR spectra of the LB monolayer of CoPo\_63\_39 deposited at 40 mN/m (solid line) and the LB film of (tBuLG)<sub>63</sub>-b-(MLGSLG)<sub>39</sub> deposited at 20 mN/m (2 layers on each side of the silicon substrate, dotted line); (b) transmission FT-IR spectra of the LB monolayer of CoPo\_50\_11 deposited at 40 mN/m (solid line) and the LB film of (tBuLG)<sub>50</sub>-b-(MLGSLG)<sub>11</sub> deposited at 20 mN/m (4 layers on each side of the silicon substrate, dotted line).

**X-ray reflectivity electron density profiles and fit parameters**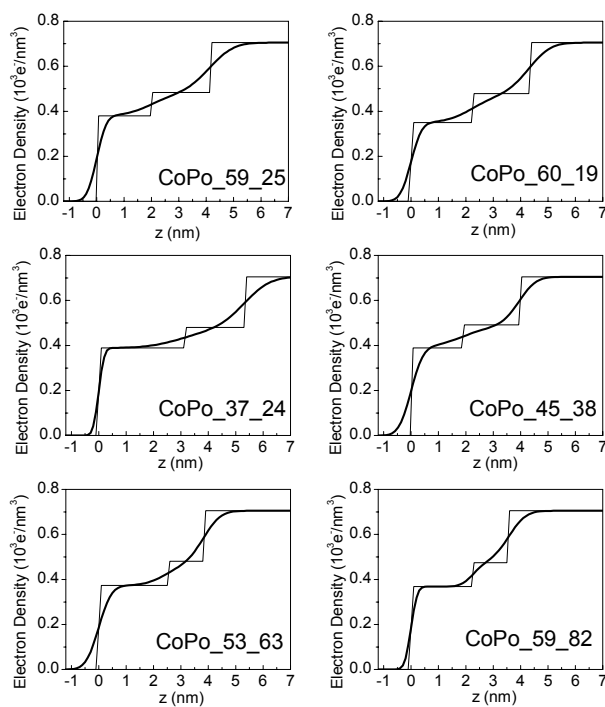

**Figure 2.** Electron density profiles corresponding to the two-slab fits for the LB monolayers of PLGA-*b*-PMLGSLGs transferred at 35-45 mN/m on silicon substrates. The smooth curves depict the electron density profiles corresponding to the curve fits, while the step-like curves show the same electron density profiles assuming all interface roughnesses to be equal to zero.

**Table 1.** Two-slab fit parameters for the X-ray reflectivity curves of the PLGA-*b*-PMLGSLG LB monolayers transferred onto silicon substrates

|                                                                      | CoPo_63_39         | CoPo_63_39         | CoPo_59_25         | CoPo_60_19         | CoPo_37_24         | CoPo_45_38         | CoPo_53_63         | CoPo_59_82         |
|----------------------------------------------------------------------|--------------------|--------------------|--------------------|--------------------|--------------------|--------------------|--------------------|--------------------|
|                                                                      | $\pi = 20$ mN/m    | $\pi = 40$ mN/m    | $\pi = 45$ mN/m    | $\pi = 40$ mN/m    | $\pi = 45$ mN/m    | $\pi = 40$ mN/m    | $\pi = 40$ mN/m    | $\pi = 35$ mN/m    |
| Layer thickness (nm)                                                 |                    |                    |                    |                    |                    |                    |                    |                    |
| L <sub>1</sub> (PLGA)                                                | 1.38               | 1.51               | 2.11               | 2.04               | 2.20               | 2.03               | 1.33               | 1.30               |
| L <sub>2</sub> (PMLGSLG)                                             | 1.88               | 2.80               | 2.02               | 2.27               | 3.14               | 1.92               | 2.53               | 2.26               |
| Total thickness                                                      | 3.26               | 4.31               | 4.13               | 4.31               | 5.34               | 3.95               | 3.86               | 3.56               |
| Electron density $\rho_i$ ( $10^3$ e <sup>-</sup> /nm <sup>3</sup> ) |                    |                    |                    |                    |                    |                    |                    |                    |
| $\rho_0$ (silicon)                                                   | 0.705 <sup>a</sup> |
| $\rho_1$ (PLGA)                                                      | 0.491              | 0.496              | 0.483              | 0.478              | 0.480              | 0.492              | 0.481              | 0.474              |
| $\rho_2$ (PMLGSLG)                                                   | 0.383              | 0.387              | 0.380              | 0.350              | 0.389              | 0.389              | 0.373              | 0.368              |
| Interface roughness (nm)                                             |                    |                    |                    |                    |                    |                    |                    |                    |
| $\sigma_{01}$ (silicon/PLGA)                                         | $0.48 \pm 0.04^a$  | $0.48 \pm 0.04^a$  | 0.69 <sup>b</sup>  | 0.63 <sup>b</sup>  | 0.74 <sup>b</sup>  | $0.48 \pm 0.04^a$  | $0.48 \pm 0.04^a$  | $0.48 \pm 0.04^a$  |
| $\sigma_{12}$ (PLGA/PMLGSLG)                                         | 0.32               | 0.82               | 0.76               | 0.76               | 0.98               | 0.89               | 0.65               | 0.35               |
| $\sigma_{23}$ (PMLGSLG/air)                                          | 0.49               | 0.29               | 0.28               | 0.31               | 0.16               | 0.35               | 0.37               | 0.18               |

<sup>a</sup> Values kept fixed for the curve fits.

<sup>b</sup>  $\sigma$  was first fixed at  $0.48 \pm 0.04$  nm, the average roughness of bare silicon wafers, and the other parameters were varied. Finally  $\sigma$  was varied to obtain the best curve fit.

**Table 2** Three-slab fit parameters for the X-ray reflectivity curve of the LB monolayer of CoPo\_50\_11 transferred onto a silicon substrate at 40 mN/m

|                                                                      |       |
|----------------------------------------------------------------------|-------|
| Layer thickness (nm)                                                 |       |
| L <sub>1</sub> (PLGA)                                                | 5.83  |
| L <sub>2</sub> (PMLGSLG)                                             | 1.56  |
| L <sub>3</sub> (alkyl chains)                                        | 1.37  |
| Total thickness                                                      | 8.76  |
| Electron density $\rho_i$ ( $10^3$ e <sup>-</sup> /nm <sup>3</sup> ) |       |
| $\rho_0$ (silicon)                                                   | 0.705 |
| $\rho_1$ (PLGA)                                                      | 0.460 |
| $\rho_2$ (PMLGSLG)                                                   | 0.370 |
| $\rho_3$ (alkyl chains)                                              | 0.284 |
| Interface roughness (nm)                                             |       |
| $\sigma_{01}$ (silicon/PLGA) <sup>a</sup>                            | 1.00  |
| $\sigma_{12}$ (PLGA/PMLGSLG)                                         | 1.65  |
| $\sigma_{23}$ (PMLGSLG/alkyl chains)                                 | 0.95  |
| $\sigma_{34}$ (alkyl chains/air)                                     | 0.28  |

<sup>a</sup>  $\sigma$  was first fixed at  $0.48 \pm 0.04$  nm, the average roughness of bare silicon wafers, and the other parameters were varied, and finally  $\sigma$  was varied to obtain the best curve fit.
